# Supplementary material
Source: publisher figshare collection journal article supplement (https://tandf.figshare.com/ndownloader/files/12298868)
Supplement: Supplementary file 1 [file 12298868]

**GENERAL DATA ON THE APIARY:**

Date:

Apiary name:

Size (Number of colonies):

RENSPA:

Geographic location (latitude/longitude):

Beekeeping experience (number of years in the activity):

Scale of beekeeping:

a) hobbyist

b) semi-professional

c) professional beekeepers

**MANAGEMENT PRACTICES**:

**1.1. Protein diet:** What pollen supplement do you use?

a) Commercial natural pollen

b) Natural pollen that you collect

c) Commercial patties

d) Homemade patties

e) No supplementation

**1.2**. Do you add multivitamins?

a) Yes

b) No

**1.3**. When do you supplement:

a) Every year

b) When is necessary

**2.1.** **Carbohydrate supply**: Do you feed colonies with sucrose syrup or other energetic supplement?

a) Yes

b) No

**2.2.** If you say yes, what food do you use?

a) Sucrose syrup

b) Sugar

c) High Fructose Corn Syrup (HFCS)

d) Honey

e) A mixture of all

**2.3.** At what season do you supplement?

a) Autumn

b) Spring

c) Other (specify):

**2.4.** When do you supplement:

a) Every year

b) When is necessary

**3.1. Requeening**: Do you do requeening?

a) Yes

b) No

**3.2.** Frequency (in years) of requeening

a) every year

b) every two years

c) more than two years

d) no requeening

**4. Colony multiplication:** how do you make it?

a) Production of nuclei at spring

b) Colonies division at autumn

c) Other

**5. Annual comb replacement:** how many combs per colony/per year?

a) less than 3 per colonie

b) 3 per colonie

c) more than 3 per colonie

d) no comb replacement

**6.1. Wooden ware disinfection:**

a) yes

b) No

**6.2.** If you say yes, how do you disinfect?

a) Melting

b) Flaming

c) Chlorine bleach wash

d) Left at the apiary

e) Bolting

**7. Apiary location:**

a) Under perennial trees

b) Under deciduous trees

c) Direct sun, without trees

**8.1. Migratory beekeeping:** Do you do this?

a) yes

b) No

**8.2.** If you say yes: to which crops?

**8.3.** When?

**8.4.** How long?

**8.5.** Do you monitor and treat the colonies against *Varroa destructor* after the moving?

a) Yes

b) No

**9. Do you use a winter cover for the colony (to protect the colony from cold)?**

a) Yes

b) No

**10.1. Do you apply a Varroa control treatment in autumn?**

a) Yes

b)No

**10.2.** Do you monitor infestation level; prior to and after treatment?

a) before-treatment

b) after-treatment

c) Both

d) None

**10.3**. Active substance (autumn treatment)

a) Oxalic acid

b) Formic acid

c) Amitraz

d) Timol

e) Flumetrine

f) Fluvalinate

g) Coumaphos

**10.4**. Commercial name of the product

**10.5.** Application procedure

**10.6.** Application date

**10.7.** Observations:

**10.8.** Do you apply late winter–spring treatment?

a) Yes

b) No

**10.9**. Active substance:

a) Oxalic acid

b) Formic acid

c) Amitraz

d) Timol

e) Flumetrine

f) Fluvalinate

g) Coumaphos

**11.** Commercial name of the product

**11.1.** Application procedure

**11.2.** Application date

**11.3.** Observations:

**11.4. Nosema treatments**

a) Yes

b) No

**11.5.** If you say yes, do you monitored spores number first?

a) Yes

b) No

**11.6.** Nosema levels prior to treatment

a) Less than 350000

b) Between 350000 and 1000000

c) More than 1000000

**11.7.** Commercial product and application date

**11.8.** Observations:

**12.** There is any apiary closer of yours?

a) Yes

b) No

**12.1.** How many?

**12.2.** How far are they?

**12.3.** How big are they? (Number of colonies per apiary)

**13. Winter mortality (in percentage) over the last 3 years**

2012:

2013:

2014:

**13.1**. To what do you attribute the cause of death for the colonies that died?

**14. Honey production**: what was the average production per colony over the last 3 years?

2011-2012:

2012-2013:

2013-2014:

**15. What kind of pastures, vegetation or crops do you have around the apiary?**

North:

West:

Apiary

East:

South:
